# Supplementary material for: Brief Report: Social Disability in Autism Spectrum Disorder: Results from Research Units on Pediatric Psychopharmacology (RUPP) Autism Network Trials
Source: Springer Nature journal article supplement (doi:10.1007/s10803-012-1689-3), 2012-10-26
Supplement: MOESM1 [file 555174]

Supplement for Scahill et al., ABC Social Withdrawal subscale in Autism Spectrum Disorders

| **Table 1. Schedule of Measures for Eight-Week Acute Phase in Two RUPP Trials** | | | | | | | | | | |
| --- | --- | --- | --- | --- | --- | --- | --- | --- | --- | --- |
| ***Parent Interviews & Ratings*** | **Screening** | **Baseline** | **1** | **2** | **3** | **4** | **5** | **6** | **7** | **8** |
| ADI - R[1] | X |  |  |  |  |  |  |  |  |  |
| Vineland [2] |  | X |  |  |  |  |  |  |  |  |
| Aberrant Behavior Checklist | X | X |  | X |  | X |  | X |  | X |
| CSI [3] | X |  |  |  |  |  |  |  |  |  |
| 36-item Parent Stress Index | X |  |  |  |  |  |  |  |  |  |
| ***Subject Assessments*** |  |  |  |  |  |  |  |  |  |  |
| Intelligence Test [4] | X | X |  |  |  |  |  |  |  |  |
| Peabody Picture Vocabulary Test | X |  |  |  |  |  |  |  |  |  |
| Medical History | X |  |  |  |  |  |  |  |  |  |
| Physical Exam | X |  |  |  |  |  |  |  |  | (X) |
| Vital Signs, Height, Weight | X | X | X | X | X | X | X | X | X | X |
| Electrocardiogram | X |  |  |  |  |  |  |  |  | (X) |
| Clinical Labs**, Urinalysis | X |  |  |  |  |  |  |  |  | (X) |
| Pregnancy Test (Beta hCG) | X |  |  |  |  |  |  |  |  | X |
| Anticonvulsant Levels | X |  |  |  |  | X |  |  |  | X |
| Research Labs [5] | X |  |  |  |  |  |  |  |  | (X) |
| Genotype Sample | X |  |  |  |  |  |  |  |  | [X] |
| ***Treating Clinician*** |  |  |  |  |  |  |  |  |  |  |
| Side Effects Review |  | X | X | X | X | X | X | X | X | X |
| Adverse Events Log |  | X | X | X | X | X | X | X | X | X |
| Concomitant Medication and Treatment Review | X | X | X | X | X | X | X | X | X | X |
| Simpson-Angus Scale |  | X | X | X | X | X | X | X | X | X |
| AIMS [6] |  | X |  |  |  |  |  |  |  | X |
| ***Independent Evaluator*** |  |  |  |  |  |  |  |  |  |  |
| ABC-Irritability subscale review | X |  |  |  |  |  |  |  |  |  |
| Target Problem review | X | X |  |  |  | X |  |  |  | X |
| C-YBOCS-PDD [7] | X | X |  |  |  | X |  |  |  | X |
| CGI-Severity [8] | X | X |  |  |  |  |  |  |  | X |
| CGI-Improvement |  |  | X | X | X | X | X | X | X | X |
| (X) for subjects who exit the trial at week 8; [X] if not collected at screening and subject exits early or is having anticonvulsant level drawn; D=distribute, C=collect; ** fasting is strongly preferred. [1] ADI- R=Autism Diagnostic Interview – Revised ; [2] Survey Form (all domains), plus Non-compliance Index for Daily Living; [3] Child Symptom Inventory; [4] Stanford-Binet V; Leiter-R ; Mullen or Slosson; [5] genetics, metabolic, neuroendocrine and drug level. [6] Abnormal Involuntary Movement Scale; [7] Children's Yale Brown Obsessive Compulsive Scales; [8] Clinical Global Impression. | | | | | | | | | | |

| Table 1 Baseline characteristics across four groups in two RUPP Autism Network Risperidone Trials | | | | | |
| --- | --- | --- | --- | --- | --- |
|  | RUPP1 | | RUPP2 | |  |
|  | 1  Placebo  (N=52) | 2  Risperidone  (N=49) | 3  Risperidone  (N=49) | 4  Risperidone + PT (N=75) | p value |
| Mean Age (SD) | 9.1 (2.6) | 8.6 (2.97) | 7.50 (2.80) | 7.38 (2.21) | 0.0010  0.0036(1 vs. 3)  0.0132(2 vs. 4)  0.0004(1 vs. 4) |
|  | N (%) | N (%) | N (%) | N (%) |  |
| Males | 43 (82.7) | 39 (79.6) | 40 (82) | 65 (87) | 0.7552 |
| **ASD Diagnosis** |  |  |  |  | <0.0001  <0.0001(1 vs. 3)  <0.0001(1 vs. 4)  <0.0001(3 vs. 2)  <0.0001(4 vs. 2)  0.0375(3 vs. 4) |
| Autistic Disorder | 52 (100%) | 49 (100%) | 32(65.3) | 49 (65.3) |  |
| PDD-NOS | 0 | 0 | 13 (26.5) | 22 (29.3) |  |
| Asperger’s | 0 | 0 | 4 (8.2) | 4 (5.3) |  |
| **IQ** |  |  |  |  | <0.0001  0.0007(1 vs. 3)  <0.0001(1 vs. 4)  0.0148(2 vs. 3)  <0.0001(2 vs. 4) |
| > 70 | 6 (13.0) | 11 (23.9) | 23 (46.9) | 46 (63.0) |  |
| < 70 | 39 (86.7) | 35 (76.1) | 26 (53.1) | 27 (37.0) |  |
| **CGI** |  |  |  |  | 0.3799 |
| Moderate | 9 (18) | 9 (18) | 14 (28.6) | 25 (33.3) |  |
| Marked | 28 (57) | 27 (49) | 19 (38.8) | 33 (44.0) |  |
| Severe | 12 (24) | 12 (24) | 15 (30.6) | 17 (22.7) |  |
| Extreme | 0 | 1 (2) | 1(2.0) | 0 (0.0) |  |
| **Vineland (standard scores)** | Mean (SD) | Mean (SD) | Mean (SD) | Mean (SD) |  |
| Communication | 42.0 (14.3) | 45.0 (16.7) | 53.2(19.94) | 61.1 (20.95) | <0.0001  0.0026(1 vs. 3)  <0.0001(1 vs. 4)  0.0353(2 vs. 3)  <0.0001(2 vs. 4) |
| Socialization | 47.4 (10.1) | 49.1 (16.6) | 53.5 (14.41) | 59.5 (15.01) | <0.0001  0.0336(1 vs. 3)  <0.0001(1 vs. 4)  0.0001(2 vs. 4)  0.0221(3 vs. 4) |
| Daily Living | 34.0 (15.6) | 40.8 (21.0) | 41.1 (19.81 | 50.8 (18.49) | <0.0001  <0.0001(1 vs. 4)  0.0063(2 vs. 4)  0.0056(3 vs. 4) |
| **ABC** |  |  |  |  |  |
| Irritability | 25.5 (6.6) | 26.2 (7.9) | 29.7 (6.1) | 29.3 (7.0) | 0.0026  0.0040(1 vs. 3)  0.0039(1 vs. 4)  0.0139(2 vs. 3)  0.0151(2 vs. 4) |
| Social Withdrawal | 16.1 (8.7) | 16.4 (8.2) | 17.1 (8.5) | 15.2 (9.0) | 0.6336 |
| Stereotypy | 9.0 (4.4) | 10.6 (4.9) | 10.6 (5.5) | 7.59 (5.2) | 0.0017  0.0011(2 vs. 4)  0.0015(3 vs. 4) |
| Hyperactivity | 32.3 (8.5) | 31.8 (9.6) | 36.1 (6.9) | 35.3 (9.3) | 0.0264  0.0302(1 vs. 3)  0.0188(2 vs. 3)  0.0327(2 vs. 4) |
| Inappropriate Speech | 6.5 (3.6) | 4.8 (4.1) | 6.37 (4.0) | 5.75 (3.4) | 0.1489 |
| **CSI** |  |  |  |  |  |
| PDD | 23.2 (7.7) | 24.3 (6.9) | 23.2 (7.0) | 22.0 (7.7) | 0.4461 |
| Anxiety | 13.8 (7.6) | 14.5 (9.7) | 14.6 (9.5) | 17.2 (10.3) | 0.1891 |

| Table 2. Baseline demographic and clinical characteristics in two RUPP trials | | | | | |
| --- | --- | --- | --- | --- | --- |
|  | | RUPP1 (N=101) | RUPP2 (N=124) |  |  |
|  | | Mean (SD) | Mean (SD) | T statistic | p value |
|  | | 8.73 (2.70) | 7.43 (2.45) | 3.78 | <0.01 |
| ABC | Irritability | 25.84 (7.59) | 29.48 (6.62) | -3.81 | <0.01 |
|  | Social Withdrawal | 16.42 (8.56) | 15.95 (8.78) | 0.41 | 0.68 |
|  | Hyperactivity | 32.03 (9.19) | 35.03 (35.64) | -3.04 | <0.01 |
| Vineland | Communication | 43.54 (15.54) | 58.00 (20.84) | -5.76 | <0.01 |
|  | Daily Living | 37.48(18.67) | 46.98 (19.53) | -3.69 | <0.01 |
|  | Socialization | 48.25 (13.67) | 57.15 (15.01) | -4.59 | <0.01 |
| CSI | Anxiety | 14.09 (8.58) | 16.19 (10.05) | -1.61 | 0.11 |
|  | PDD | 23.60 (7.28) | 22.50 (7.41) | 1.09 | 0.28 |
|  |  | N (%) | N (%) | Χ2 statistic | p-value |
| IQ* | > 70 | 17 (18.7) | 69 (56.6) | 29.5 | <.0001 |
|  | < 70 | 74 (81.3) | 53 (43.4) |  |  |
| Race/  Ethnicity | White | 67 (66.3) | 93 (75) | 1.63 | 0.2 |
| Black | 11 (10.9) | 16 (12.9) |  |  |
|  | Hispanic | 7 (6.9) | 11 (8.9) |  |  |
|  | Asian | 8 (7.9) | 3 (2.4) |  |  |
|  | Other | 8 (7.9) | 1 (0.8) |  |  |
| Education | Regular Class | 8 (7.9) | 45 (36.3) | 21.3 | <.001 |
|  | Special Education | 88 (87.1) | 58 (46.8) |  |  |
|  | Residential | 1 (0.9) | 0 |  |  |
|  | Other | 0 | 23 (18.5) |  |  |
|  |  |  |  |  |  |
| * unable to obtain IQ in a total of 12 subjects; 10 in RUPP 1 and 2 in RUPP 2. | | | | | |

| **Table 3. Correlations between the Social Withdrawal scale and other behavioral scales for entire sample and by IQ subgroup** | | | | |
| --- | --- | --- | --- | --- |
|  | **Measure** | **Total Sample (n=225)** | **IQ<70**  **(n =127)a** | **IQ>70**  **(n=86)a** |
| ABC | Irritability | 0.30** | 0.41 ** | 0.07 (p=0.50) |
| Stereotypy | 0.45** | 0.46 ** | 0.44 ** |
| Hyperactivity | 0.22 ** | 0.33 ** | 0.04 (p=0.75) |
| Inappropriate Speech | 0.19 | 0.27 ** | 0.10 (p=0.36) |
|  | Communication | -0.21 ** | -0.12 (p=0.18) | -0.29 ** |
| Vineland | Daily Living | -0.23 ** | -0.03 (p=0.74) | -0.42 ** |
|  | Socialization | -0.21 ** | -0.15 (p=0.09) | -0.22* |
| CASI | Anxiety Scale | 0.23 ** | 0.27 ** | 0.24* |
| PDD Scale | 0.35 ** | 0.47 ** | 0.16 (p=0.13) |
| a= IQ was not obtained for 12 subjects; * < .05; ** < .01 | | | | |
